# Supplementary material for: Off-Hours versus Regular-Hours Implantation of Peripheral Venoarterial Extracorporeal Membrane Oxygenation in Patients with Cardiogenic Shock
Source: MDPI journal article supplement (doi:10.3390/jcm12051875), 2023-02-27
Supplement: s1 [file s1]

**Table S1.** In-hospital mortality rates according to venoarterial extracorporeal membrane oxygenation indication.

|                                            | <b>Total</b> | <b>Regular-hours</b> | <b>Off-hours</b> | <b>p</b> |
|--------------------------------------------|--------------|----------------------|------------------|----------|
| Acute myocardial infarction, n (%)         | 23 (46)      | 12 (48)              | 11 (44)          | 0.777    |
| Cardiac arrest, n (%)                      | 26 (72)      | 13 (68.4)            | 13 (76.5)        | 0.590    |
| Pulmonary embolism, n (%)                  | 12 (63.2)    | 6 (54.5)             | 6 (75)           | 0.361    |
| Arrhythmic storm, n (%)                    | 6 (37.5)     | 4 (33.3)             | 2 (50)           | 0.551    |
| Acute heart failure, n (%)                 | 5 (71.4)     | 4 (80)               | 1 (50)           | 0.427    |
| Myocarditis, n (%)                         | 3 (50)       | 2 (66.7)             | 1 (33.3)         | 0.414    |
| Acute respiratory distress syndrome, n (%) | 3 (75)       | 2 (100)              | 1 (50)           | 0.248    |
| Takotsubo cardiomyopathy, n (%)            | 0 (0)        | 0 (0)                | -                | -        |

**Table S2.** In-hospital mortality rates according to the use and type of left ventricular unloading device.

|                      | Left ventricular unloading | No left ventricular unloading | p     | IABP      | Impella CP | p     |
|----------------------|----------------------------|-------------------------------|-------|-----------|------------|-------|
| Total, n (%)         | 54 (51.4)                  | 27 (65.9%)                    | 0.115 | 42 (48.8) | 13 (65)    | 0.193 |
| Regular-hours, n (%) | 32 (55.2)                  | 13 (59.1)                     | 0.752 | 29 (52.7) | 3 (100)    | 0.752 |
| Off-hours, n (%)     | 22 (46.8)                  | 14 (73.7)                     | 0.045 | 13 (41.9) | 10 (58.8)  | 0.263 |

<sup>1</sup>IABP: intra-aortic balloon pump.

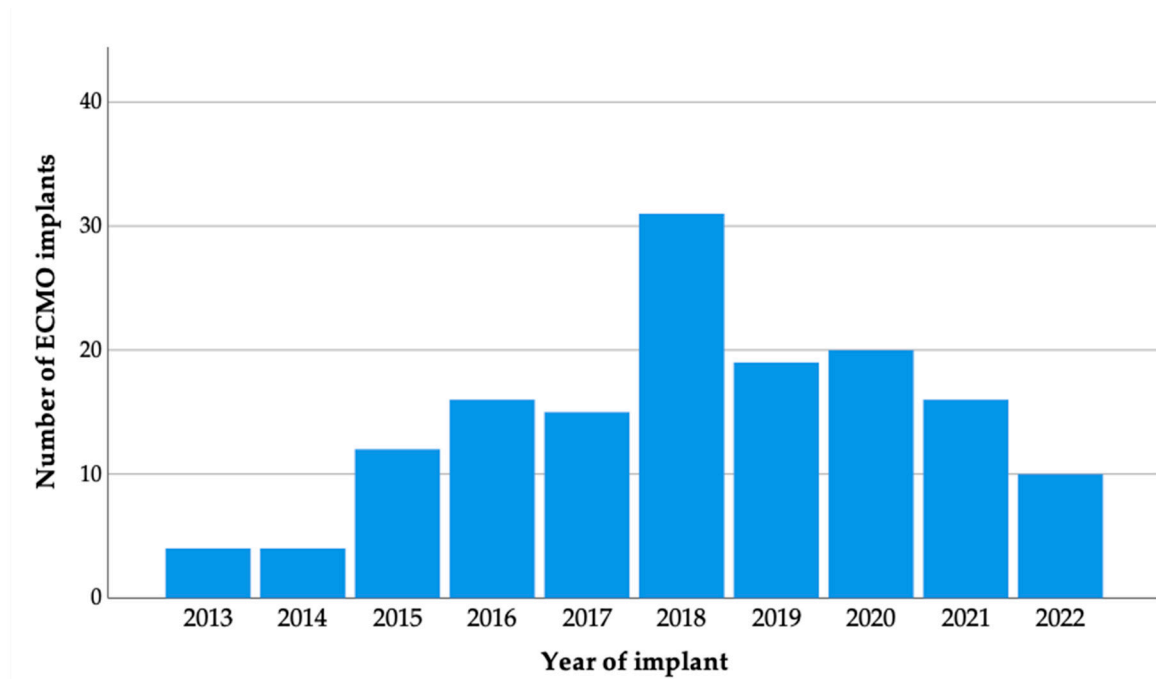

**Figure S1.** Number of venoarterial extracorporeal membrane oxygenation implants made each year. Please note 2022 only includes the first months.

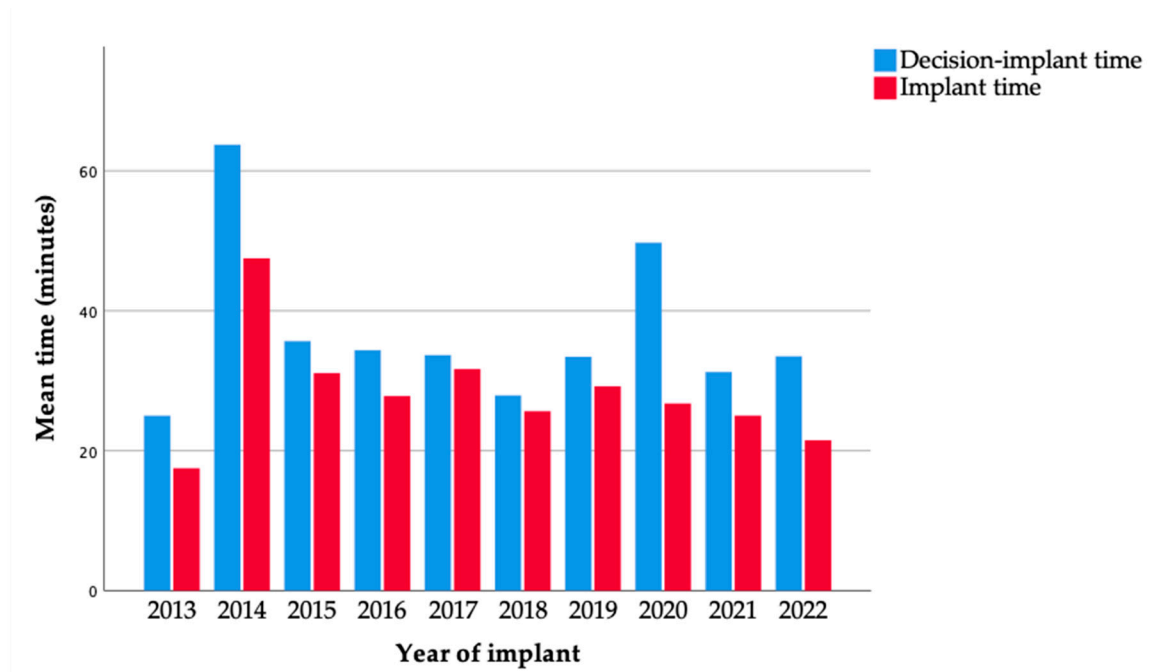

**Figure S2.** Implant time and decision-implant time according to year of implant. Please note year 2020 might reflect a longer decision-implant time conditioned by the effects of COVID-19 pandemic.
